# Supplementary material for: Boosting Photovoltaic Performance in Organic Solar Cells by Manipulating the Size of MoS2 Quantum Dots as a Hole-Transport Material
Source: Nanomaterials (Basel). 2021 Jun 1;11(6):1464. doi: 10.3390/nano11061464 (PMC8228263; doi:10.3390/nano11061464)
Supplement: Supplementary file 1 [file nanomaterials-11-01464-s001.zip › nanomaterials-1205918-supplementary.pdf]

## Supplementary Materials

# Boosting Photovoltaic Performance in Organic Solar Cells by Manipulating the Size of MoS<sub>2</sub> Quantum Dots as a Hole-Transport Material

Kwang Hyun Park <sup>1</sup>, Sunggyeong Jung <sup>1</sup>, Jungmo Kim <sup>2</sup>, Byoung-Min Ko <sup>1</sup>, Wang-Geun Shim <sup>3</sup>, Soon-Jik Hong <sup>1</sup> and Sung Ho Song <sup>1,\*</sup>

<sup>1</sup> Division of Advanced Materials Engineering, Kongju National University, Cheonan-si 32588, Korea; recite14@gmail.com (K.H.P.); jsk71317@gmail.com (S.J.); qudals3920@gmail.com (B.-M.K.); hongsj@kongju.ac.kr (S.-J.H.)

<sup>2</sup> Nano Hybrid Technology Research Center, Korea Electrotechnology Research Institute, 12 Jeongiui-gil, Seongsan-gu, Changwon-si 51543, Korea; jungmokim@keri.re.kr

<sup>3</sup> Department of Chemical Engineering, Sunchon National University, 255 Jungang-Ro, Suncheon-si 57922, Korea; wgshim@scnu.ac.kr

\* Correspondence: shsong805@kongju.ac.kr; Tel.: +82-041-521-9379

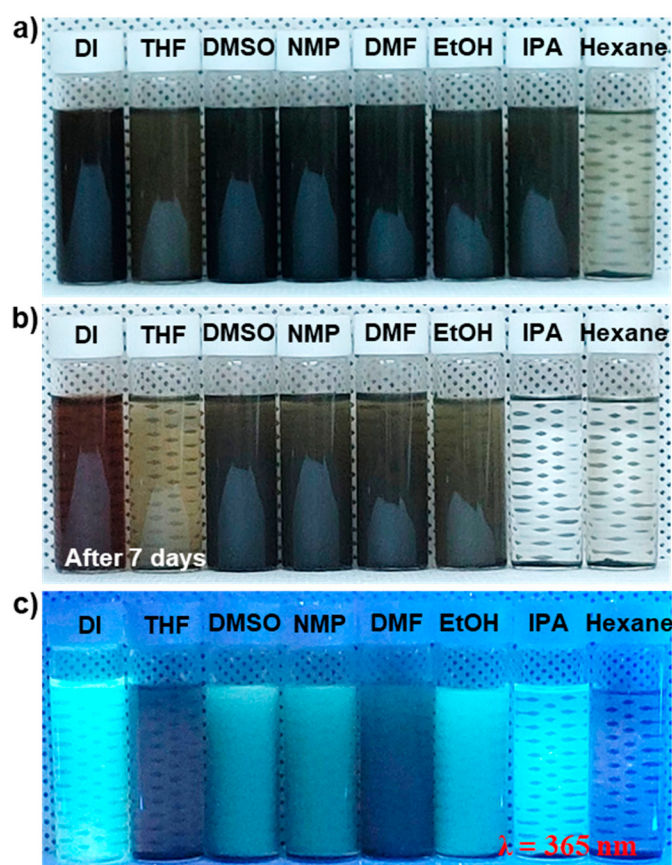

**Figure S1.** Digital images of the MoS<sub>2</sub> quantum dots (a), MoS<sub>2</sub> QDs exfoliated in various solvents with different polarity index. (b), MoS<sub>2</sub> QDs dispersed in various solvents after 7 days. (c), Photoluminescence of MoS<sub>2</sub> QDs dispersed in various solvents TEM at excitation wavelength of 365 nm.

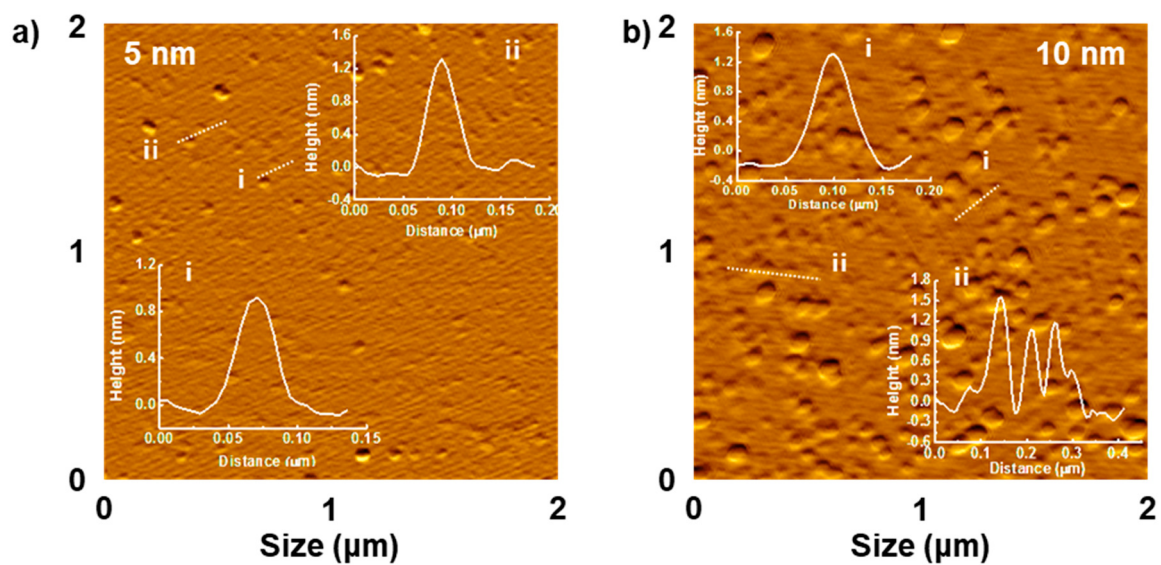

**Figure S2.** AFM images of 5 and 10 MoS<sub>2</sub> quantum dots (a), Topology image of 5 nm MoS<sub>2</sub> QDs. (Inset: thickness profiles of 5 nm MoS<sub>2</sub> QD. (b), Topology image of 10 nm MoS<sub>2</sub> QDs. (Inset: thickness profiles of 10 nm MoS<sub>2</sub> QD.

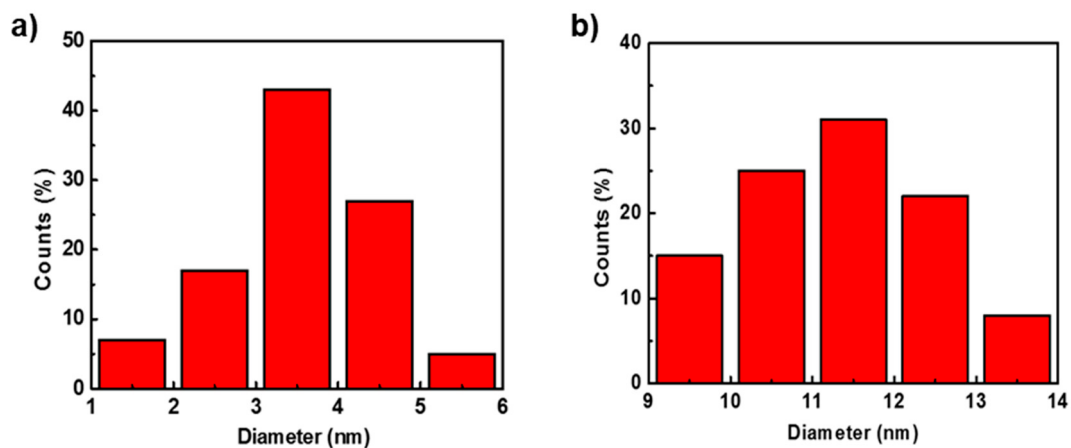

**Figure S3.** Size distribution of the MoS<sub>2</sub> QDs (a) 5 nm MoS<sub>2</sub> QD, (b) 10 nm MoS<sub>2</sub> QD.

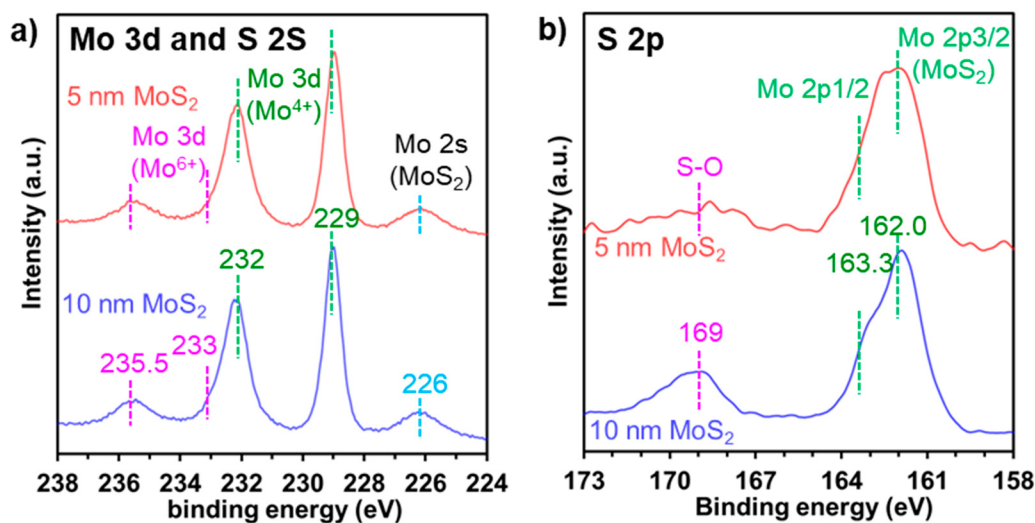

**Figure S4.** XPS spectra of Mo 3d and S 2p for 5 and 10 MoS<sub>2</sub> quantum dots (a), Mo 3d (b), S 2p.

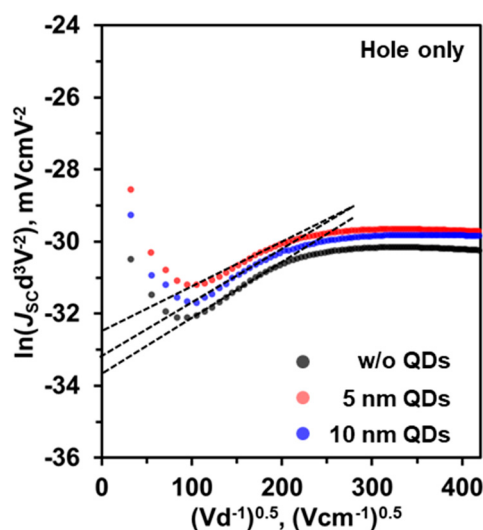

**Figure S5.** Hole mobility of hole-only device of PTB7:PC<sub>71</sub>BM with/without MoS<sub>2</sub> QDs by a space charge limited current (SCLC) method.

The hole mobilities for PTB7-based devices fabricated by deposition of 5 nm/10 nm QDs were assessed and estimated by the space-charge limited current (SCLC) method [1,2], as shown in Figure S4 and Experimental section. The devices fabricated by deposition of 5/10 nm MoS<sub>2</sub> QDs show enhanced hole mobilities ( $\mu_h = 2.65 \times 10^{-4} \text{ cm}^2 \text{ V}^{-1} \text{ s}^{-1}$  and  $\mu_h = 1.32 \times 10^{-4} \text{ cm}^2 \text{ V}^{-1} \text{ s}^{-1}$  for 5 nm and 10 nm MoS<sub>2</sub> QD, respectively) compared to that of the control device ( $\mu_h = 4.2 \times 10^{-5} \text{ cm}^2 \text{ V}^{-1} \text{ s}^{-1}$  for the control device). Especially, the 5 nm MoS<sub>2</sub> QD leads to the highest level of hole mobility, which is consistent with the enhanced performance ascribed to values of  $J_{sc}$  and  $FF$  in the OSCs.

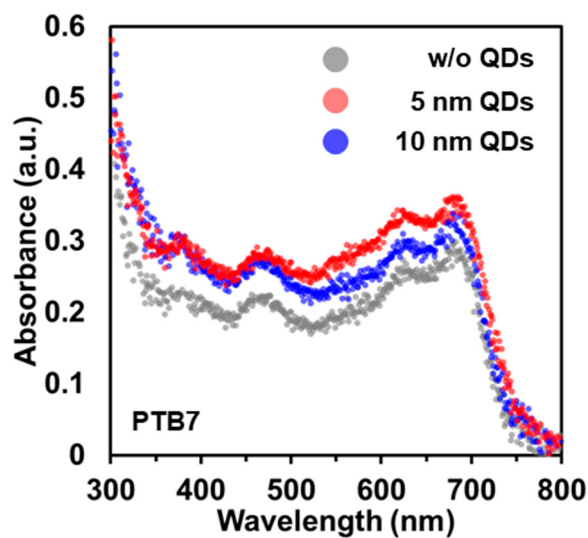

**Figure S6.** UV-vis absorption spectra of ITO/PEDOT:PSS/hole-transport material/active material films without and with 5 and 10 MoS<sub>2</sub> quantum dots as hole transport layer.

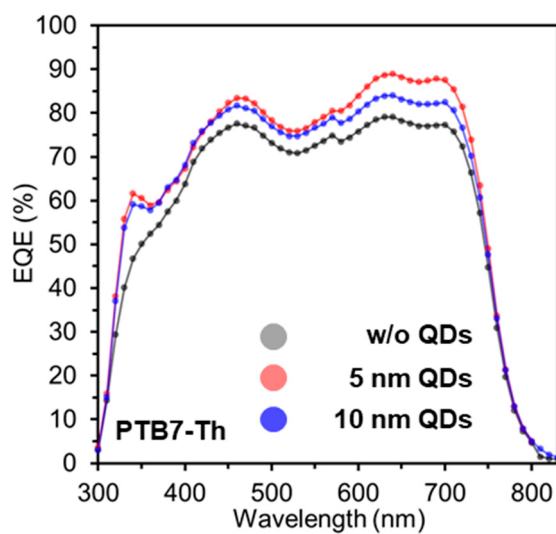

|                                | w/o MoS <sub>2</sub> QD | 5 MoS <sub>2</sub> QD | 10 MoS <sub>2</sub> QD |
|--------------------------------|-------------------------|-----------------------|------------------------|
| $J_{sc}$ (mA/cm <sup>2</sup> ) | 17.9                    | 19.7                  | 19.1                   |

**Figure S7.** EQE spectra of PTB7-Th:PCB<sub>71</sub>M based OSCs with 5 and 10 MoS<sub>2</sub> quantum dot as hole-transport layer.

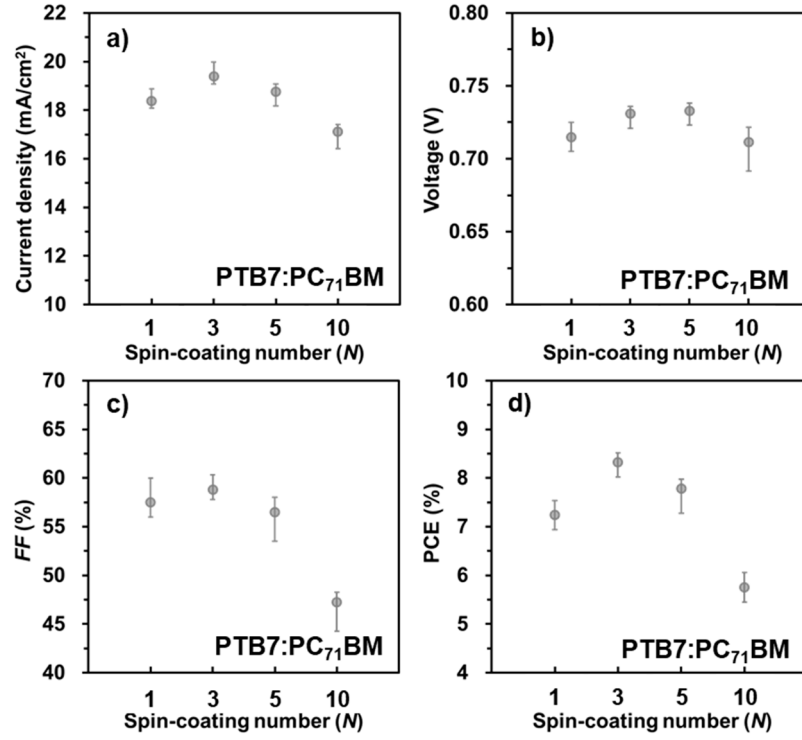

**Figure S8.** Device characteristics of PTB7:PC<sub>71</sub>BM based OSCs with 5 MoS<sub>2</sub> quantum dot as hole-transport layer. (a), short-circuit current density ( $J_{sc}$ ). (b), open-circuit voltage ( $V_{oc}$ ). (c), Fill factor ( $FF$ ). (d), Power conversion efficiency (PCE).

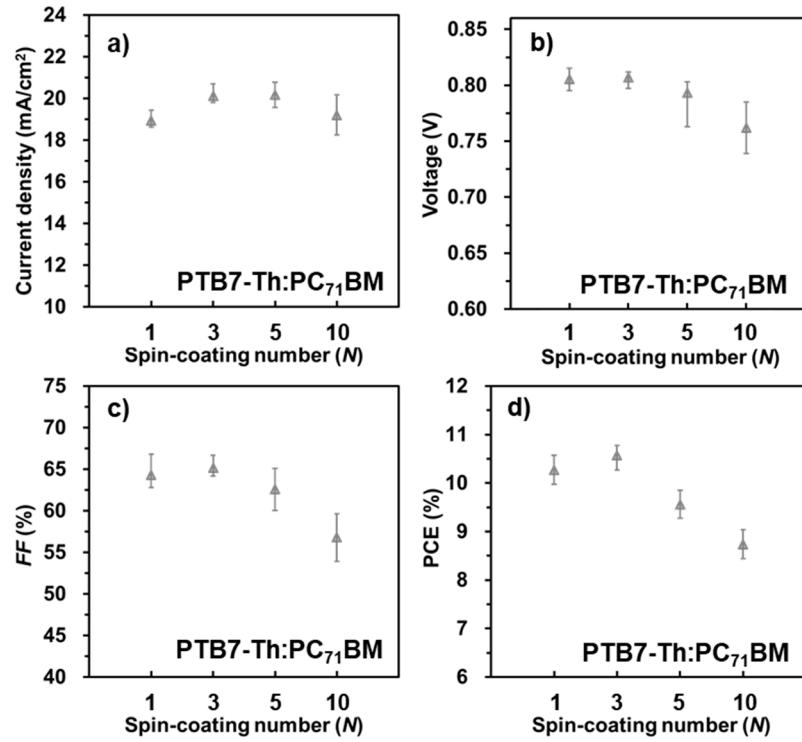

**Figure S9.** Device characteristics of PTB7-Th:PC<sub>71</sub>BM based OSCs with 5 MoS<sub>2</sub> quantum dot as hole-transport layer. (a), short-circuit current density ( $J_{sc}$ ). (b), open-circuit voltage ( $V_{oc}$ ). (c), Fill factor ( $FF$ ). (d), Power conversion efficiency (PCE).

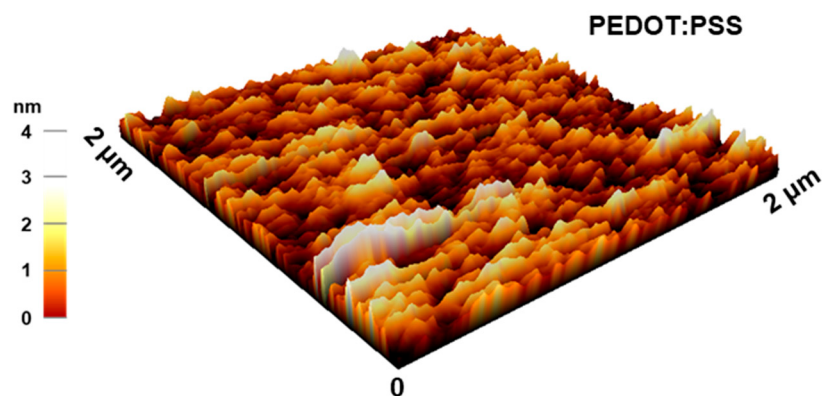

**Figure S10.** AFM image of ITO/PEDOT:PSS film.

## References

1. Sargent, E.H. Colloidal quantum dot solar cells. *Nat. Photon.* **2012**, *6*, 133–135.
2. Sun C.; Qin S.; Wang R.; Chen S.; Pan F.; Qiu B.; Shang Z.; Meng L.; Zhang C.; Xiao M.; et al. High efficiency polymer solar cells with efficient hole transfer at zero highest occupied molecular orbital offset between methylated polymer donor and brominated acceptor. *Am. Chem. Soc.* **2020**, *142*, 1465–1474.
